# Supplementary material for: Gluten-induced RNA methylation changes regulate intestinal inflammation via allele-specific XPO1 translation in epithelial cells
Source: HighWire-hosted journal article supplement (doi:10.1136/gutjnl-2020-322566), 2021-02-01
Supplement: gutjnl-2020-322566supp002_data_supplement.pdf [file gutjnl-2020-322566supp002_data_supplement.pdf]

**Supplementary Figure 1:** **a)** m<sup>6</sup>A signals in the human and mouse *XPO1* gene retrieved from the Metdb v2 database<sup>29</sup>. Blue peaks correspond to meRIP-seq reads, yellow and green boxes are exons and UTR's respectively. Location of the CD-associated rs3087898 SNP is marked in the human transcript. **b)** Secondary structure of both forms of the human *XPO1* 5'UTR as predicted using the Vienna package<sup>30</sup>. **c)** m<sup>6</sup>A RNA immunoprecipitation (meRIP) followed by RT-qPCR of the 5'UTR of *XPO1* and positive and negative controls in HCT116 intestinal and Jurkat T cell lines, n=3-5. (\*\*\*\*p<0.0001; ns: non-significant according to a two-way ANOVA test. Enrichment relative to control IgG #p<0.05, ###p<0.001, #####p<0.0001 according to a two-way ANOVA test). **d)** Left, m<sup>6</sup>A levels in the 5'UTR of *XPO1* in RNA extracted from human intestinal biopsies as assessed by meRIP-qPCR, n=3. (\*\*\*\*p< 0.0001, according to a 2-tailed Student's t-test). Right, m<sup>6</sup>A RNA immunoprecipitation (meRIP) followed by RT-qPCR of the 5'UTR of *XPO1* in immune (CD45+) and epithelial (CD326+) fractions from human intestinal biopsies, n=pool of 18 individuals. (\*\*p<0.01 according to a two-way ANOVA test. Enrichment relative to control IgG #p<0.05, ns: non-significant according to a two-way ANOVA test). **e)** m<sup>6</sup>A-RT-qPCR of the 3 m<sup>6</sup>A motifs in the 5'UTR of *XPO1* and positive and negative controls in intestinal cells, n=4. Significance was calculated relative to the negative control. (\*p<0.05, \*\*p<0.01 according to a one-way ANOVA test). **f)** Cellular localization of both *XPO1* mRNA forms *XPO1*\*C (C) and *XPO1*\*T (T) and *PO* (cytoplasmic) and *MALAT1* (nuclear) controls, n=4. (ns: non-significant according to a one-way ANOVA test). **g)** mRNA stability of both *XPO1* mRNA forms *XPO1*\*C (C) and *XPO1*\*T (T) in cells treated with actinomycin D for 3 h and 6 h, n=3. (ns: non-significant according to a two-way ANOVA test). All values are means ± SEM.

**Supplementary Figure 2:** **a)** Relative expression of *METTL3* measured by RT-qPCR and **b)** overall m<sup>6</sup>A RNA levels measured by ELISA in cells transfected with an empty vector (EV) and a vector overexpressing *METTL3* (ov*METTL3*), n=3. (\*p<0.05, \*\*\*\*p<0.0001 according to a two-tailed Student's t-test). **c-d)** Relative RNA expression measured by RT-qPCR and quantitative summary of the of *METTL3* and *YTHDF1* immunoblot in Figure 2B, (\*\*\*p<0.001, \*\*\*\*p<0.0001 according to a two-tailed Student's t-test). **e)** overall m<sup>6</sup>A RNA levels measured by ELISA, (+p<0.1, ns:non-significant according to a two-tailed Student's t-test). **f)** m<sup>6</sup>A RNA immunoprecipitation (meRIP) followed by RT-qPCR of the 5'UTR of *XPO1* (\*p<0.05; ns: non-significant according to a two-way ANOVA test. Enrichment relative to control IgG +p<0.1,

#p<0.05, ##p<0.01 according to a two-way ANOVA test) and **g**) quantitative summary of the XPO1 immunoblot in Figure 2C, n=3-4. (\*p<0.05 according to a two-tailed Student's t-test). **h-i**) METTL3 and YTHDF1 immunoprecipitation RT-qPCR values for XPO1 5'UTR and m<sup>6</sup>A positive and negative controls, n=3-4. (Enrichment relative to control IgG +p<0.1, #p<0.05, ###p<0.001, ####p<0.0001, ns: non-significant according to a two-way ANOVA test). **j**) m<sup>6</sup>A immunoprecipitation (meRIP) RT-qPCR values for XPO1 5'UTR and m<sup>6</sup>A positive and negative controls in C26 mouse intestinal cells, n=3. (ns: non-significant according to a two-way ANOVA test. Enrichment relative to control IgG ###p<0.001 according to a two-way ANOVA test). **k**) Relative expression measured by RT-qPCR and quantitative summary of YTHDF1 immunoblot in Figure 2E and **l**) relative expression of *Xpo1* measured by RT-qPCR in WT (+/-) and *Ythdf1* knockout mice (DF1 KO), n=7. (\*\*p<0.01, \*\*\*p<0.001, ns: non-significant according to a two-tailed Mann Whitney test). All values are means ± S.E.M.

**Supplementary Figure 3:** **a**) Schematic representation of the gliadin treatment set up *in vitro* (top) and *in vivo* (bottom). **b**) Left, overall m<sup>6</sup>A RNA levels measured by m<sup>6</sup>A Dotblot in cells, n=4. Right, quantitative summary of immunoblot in Figure 3A for XPO1, YTHDF1 and METTL3 in HCT116 cells, n=4. (+p<0.1, \*p<0.05, \*\*p<0.01, according to a two-tailed Student's t-test). **c**) Quantitative summary of XPO1 and YTHDF1 immunoblot in Figure 3C, n=3. (+p<0.1, ns: non-significant, according to a one-tailed Student's t-test). Silencing efficiency compared to NT cells (#p<0.05, according to a one-tailed Student's t-test). **d**) Left, overall m<sup>6</sup>A RNA levels measured by m<sup>6</sup>A Dotblot in WT control (NT) or PTG-treated mice (PTG), n=7. Right, quantitative summary of immunoblot in Figure 3D for XPO1 and YTHDF1, n=7 (+p<0.1, \*p<0.05, ns: non-significant according to a one-tailed Mann Whitney test). **e**) Left, overall m<sup>6</sup>A RNA levels measured by m<sup>6</sup>A Dotblot in humanized HLA-DR3-DQ2 control (NT) or PTG-treated mice (PTG). Right, quantitative summary of immunoblot in Figure 3D for XPO1 and YTHDF1, n=2-5 (+p<0.1, ns: non-significant according to a one-tailed Mann Whitney test). **f**) Quantitative summary of immunoblot in Figure 3F for YTHDF1 and XPO1 in untreated (-) and PTG-treated cells (+PTG) derived from wild type (WT) or *Ythdf1* KO (KO) mice, n=2-4 (+p<0.1, ns: non-significant according to a one-way ANOVA test). All values are means ± S.E.M.

**Supplementary Figure 4:** **a**) Quantitative summary of immunoblot in Figure 4A for XPO1 and p50 in cells transfected with an empty vector (EV) and overexpressing both forms of XPO1 (C

and T), n=3. (\*p<0.05, \*\*\*p<0.001 according to a two-way ANOVA test). **b)** Relative expression measured by RT-qPCR of *XPO1* and *IL8* in cells transfected with an empty vector (EV), overexpressing both forms of *XPO1* (C and T) and cells overexpressing *XPO1* and treated with the NFkB inhibitor Bay (T+BAY), n=3. (\*\*\*p<0.001, \*\*\*\*p<0.0001, ns: non-significant according to a two-way ANOVA test). **c)** Representative immunoblot and quantitative summary of the immunoblot for *XPO1* and p50 in untreated cells (NT) and cells treated with PTG, n=4. (\*p<0.05, \*\*p<0.01 according to a two-tailed Student's t-test). **d)** Quantitative summary of immunoblot in Figure 4F for *YTHDF1*, *XPO1* and p50 in untreated cells (NT), cells treated with PTG and cells treated with PTG + silenced for *YTHDF1* (PTG+siYTH), n=3. (+p<0.1, ns: non-significant according to a one-tailed Student's t-test). Silencing efficiency compared to NT cells (#p<0.05, according to a one-tailed Student's t-test). **e)** Quantitative summary of immunoblot in Figure 4G for *XPO1* and p50 in untreated cells (NT), cells treated with PTG and cells treated with + *XPO1* function inhibitor leptomycin B (PTG+LMB), n=3. (+p<0.1, \*p<0.05, ns: non-significant according to a two-way ANOVA test). **f)** Relative expression measured by RT-qPCR of *XPO1* and *IL8* in untreated cells (NT), cells treated with PTG and cells treated with PTG and *XPO1* function inhibitor leptomycin B (PTG+LMB), n=3. (\*p<0.05, \*\*\*\*p<0.0001, ns: non-significant according to a two-way ANOVA test). Quantitative summary of immunoblot for p50 protein in **g)** WT and **h)** humanized HLA-DR3-DQ2 control mice (NT) or PTG-treated mice (PTG) in Figure 4J and K, respectively. n=7 and n=2-3 (\*p<0.05 according to a one-tailed Mann Whitney test). **i)** Relative expression measured by RT-qPCR of mouse *IL8* functional homolog cytokine *Cxcl1* in untreated (-) and PTG-treated cells (+PTG) derived from wild type (WT) or *Ythdf1* KO (KO) mice, n=2-4. All values are means  $\pm$  S.E.M.

**Supplementary Figure 5:** **a)** Expression quantitative trait loci (eQTL) of *XPO1* expression levels compared between individuals with the protection genotype (CC) and individuals harboring the risk allele (CT+TT) n=7-25. Values are means  $\pm$  S.E.M. (ns: non-significant, according to a two-tailed Mann Whitney test). **b)** RNA was extracted from untreated and PTG incubated biopsies and expression of *XPO1*, *METTL3* and *YTHDF1* was measured by RT-qPCR, n=15. Values are means of induction  $\pm$  S.E.M. (+p<0.1, ns: non-significant according to a one-tailed Mann Whitney test). **c)** Correlation of the induction between *YTHDF1* and *XPO1* in PTG treated biopsies. Triangles correspond to *XPO1* mRNA and dots to *XPO1* protein induction. n=9-15, R and p were calculated by Pearson correlation.

**Supplementary Table1.** List of used qPCR primers.

| Gene         | Primer Sequence                                             |
|--------------|-------------------------------------------------------------|
| XPO1 (5'UTR) | Fw: TGTTCCAGTCTTTGCTGCTG<br>Rv: AAGGCTCGCCTAAACTTTCC        |
| METTL3       | Fw: TCGAGAGCGAAATTTTTCAAC<br>Rv: GGAGATAGAGAGCCTTCTGAACC    |
| YTHDF1       | Fw: ACCTGTCCAGCTATTACCCG<br>Rv: TGGTGAGGTATGGAATCGGAG       |
| HPRT         | Fw: ACCAGTCAACAGGGGACATAA<br>Rv: CTTTCGTGGGGTCCTTTTCACC     |
| TUG1         | Fw: ATTCCACGACCATGGTTGTC<br>Rv: ATTCACCACCAACCACACAG        |
| SOCS1        | Fw: AGACCCCTTCTCACCTCTTG<br>Rv: AGTTAAGCTGCTACAACAACCAG     |
| IL8          | Fw: ACTGAGAGTGATTGAGAGTGGAC<br>Rv: AACCCCTCTGCACCCAGTTTTTC  |
| 5'UTR Xpo1   | Fw: GGTGGGAAAACCTGTGAAACCC<br>Rv: ACTGCTTCTTCCTTCCTTGTC     |
| Ythdf1-/-    | Fw: CCTGCATTCTCAGCATGG<br>Rv: GCTCCAGACTGTTTCATCC           |
| Hprt         | Fw: CTGGTGAAAAGGACCTCTCGAAG<br>Rv: CCAGTTTCACTAATGACACAAACG |
| Mip2a        | Fw: CCAACCACCAGGCTACAGG<br>Rv: GCGTCACACTCAAGCTCTG          |
| Cxcl1        | Fw: CTGGGATTCACCTCAAGAACATC<br>Rv: CAGGGTCAAGGCAAGCCTC      |

**Supplementary Table 2.** List of used qPCR assays.

| <b>Gene</b> | <b>Assay ID</b> |
|-------------|-----------------|
| XPO1        | C__16006954_10  |
| MALAT1      | Hs00273907_s1   |
| RPLPO       | Hs99999902_m1   |
| Mettl3      | Mm01316319_m1   |
| Ythdf1      | Mm00620538_m1   |
| Rplpo       | Mm00725448_s1   |

**Supplementary Table 3.** List of human biopsy samples.

|                              | Dx                       | ORIGIN          | AGE (years)  | SEX           | HLA          | Serology | Marsh (0-3)   |
|------------------------------|--------------------------|-----------------|--------------|---------------|--------------|----------|---------------|
|                              | <b>ADULT INDIVIDUALS</b> | <b>CD (n=6)</b> | 100% USA     | 34.2 ± 19.5   | 83.3% FEMALE |          | 100% +        |
| 16.7% MALE                   |                          |                 |              |               |              |          |               |
| <b>CTR (n=22)</b>            |                          | 31.8% USA       | 45.2 ± 11.3  | 77.3% FEMALE  | 13.6% DQ2    | 100% -   | 100% 0        |
|                              |                          | 68.2% SPAIN     |              | 22.7% MALE    | 4.5% DQ8     |          |               |
| <b>GFD (n=6)</b>             | 100% USA                 | 37.3 ± 11.4     | 33.3% FEMALE |               | 100% -       | 83.3% 0  |               |
|                              |                          |                 | 66.7% MALE   |               |              | 16.7% 1  |               |
|                              | Dx                       | ORIGIN          | AGE (years)  | SEX           | HLA          | Serology | Marsh (0-3)   |
| <b>PEDIATRIC INDIVIDUALS</b> | <b>CD (n=28)</b>         | 100% SPAIN      | 4.6 ± 3.7    | 48.5 FEMALE   | 69.7% DQ2    | 81.8% +  | 20% 0         |
|                              |                          |                 |              | 51.5 % MALE   |              |          | 9.1% DQ2/DQ8  |
|                              | <b>CTR (n=16)</b>        | 100% SPAIN      | 8.1± 3.6     | 68.75% FEMALE | -            | 100% -   | 100% 0        |
|                              |                          |                 |              | 31.25% MALE   |              |          |               |
|                              | <b>GFD (n=12)</b>        | 100% SPAIN      | 2 ± 0.7      | 69.2% FEMALE  | 69.2% DQ2    | 7.7% +   | 84.6% 0       |
|                              |                          |                 |              | 30.8% MALE    |              |          | 23.1% DQ2/DQ8 |
|                              |                          |                 |              |               |              |          | 7.7% 3        |
